# Supplementary material for: Phenotypic Characterization of Recombinant Marek’s Disease Virus in Live Birds Validates Polymorphisms Associated with Virulence
Source: MDPI journal article supplement (doi:10.3390/v15112263), 2023-11-16
Supplement: s1 [file s1]

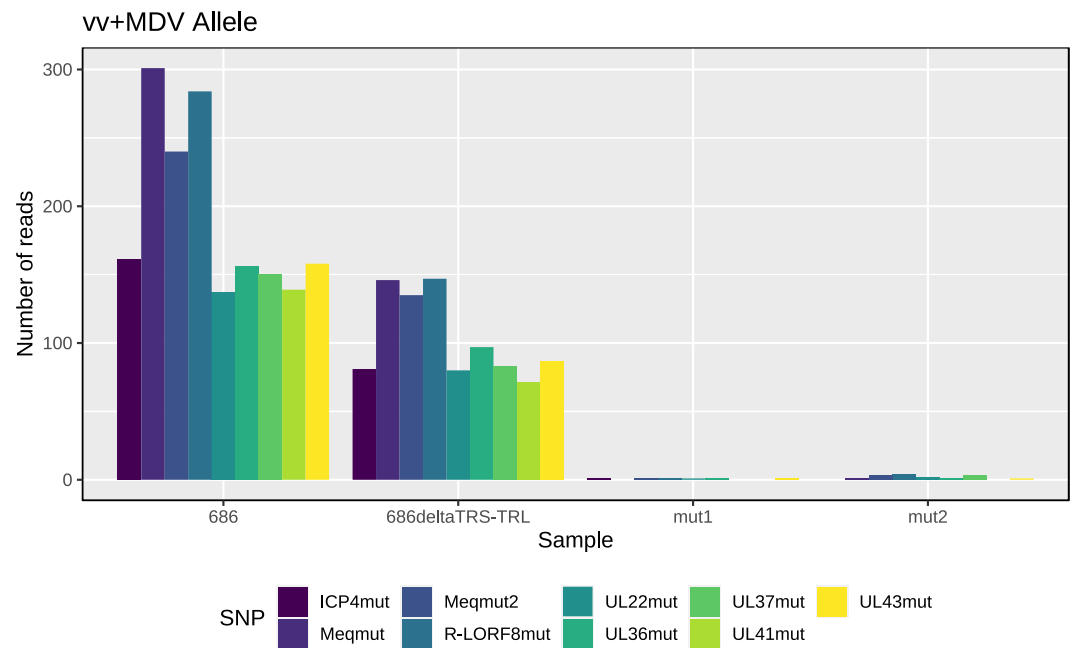

**Figure S1.** MiSeq sequence read depth for the vv+MDV allele in the 9 mutated nsSNP. The different colored bars denote the gene containing the mutated allele and the X axis identifies the BAC clone associated with the next generation sequencing reads.

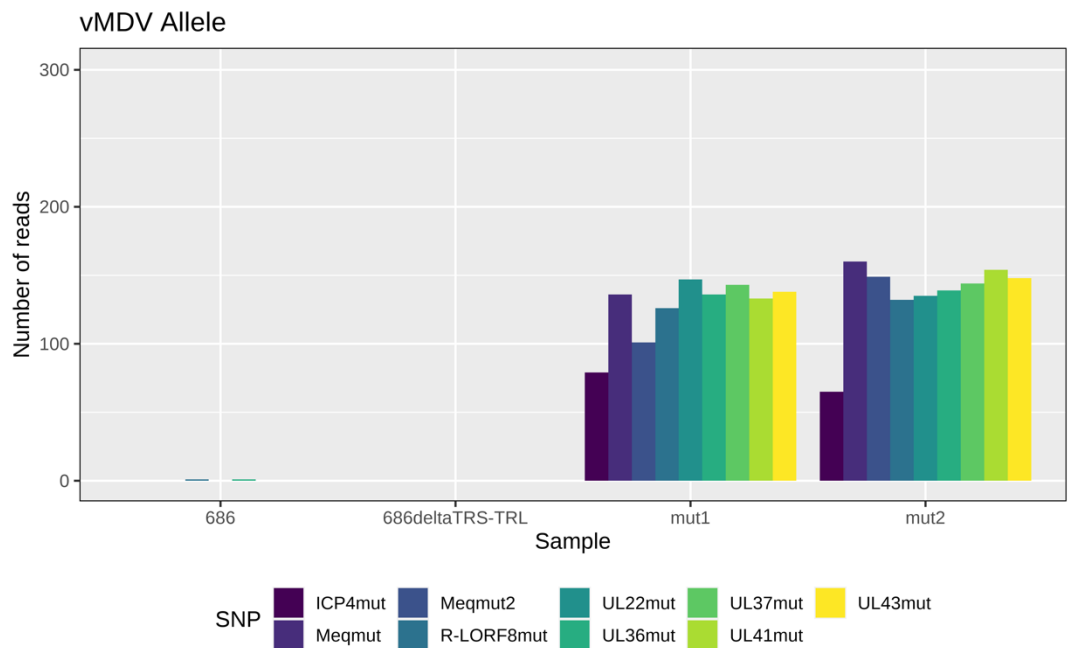

**Figure S2.** MiSeq sequence read depth for the vMDV allele in the 9 mutated nsSNP. The different colored bars denote the gene containing the mutated allele and the X axis identifies the BAC clone associated with the next generation sequencing reads.

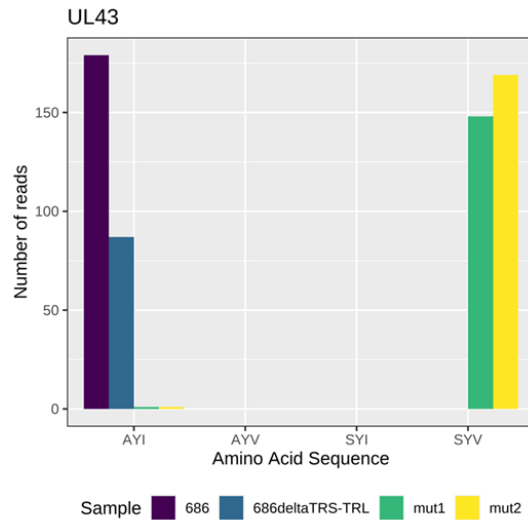

**Figure S3.** Read depth for the two non-synonymous SNPs identified in UL43. An G to T substitution upstream of the mutated allele on UL43 changes the amino acid sequence at this locus from A to S. The additional SNP segregated only in the mutated BAC clone with the mutated alleles coding as SYV at the protein sequence position 397-399.

#### UL22 (CtoA) R to M

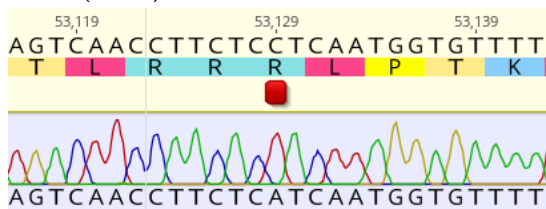

#### UL37 (AtoG) V to A

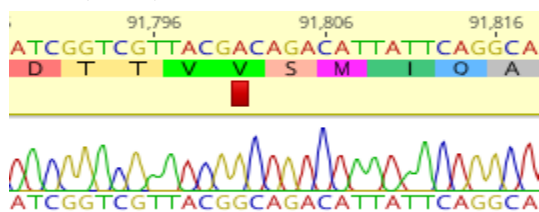

#### UL43 (AtoG) I to V

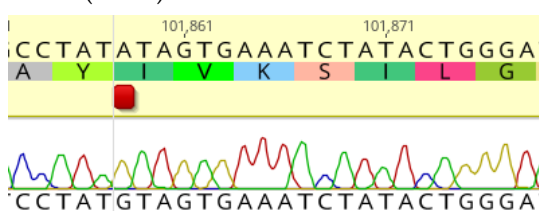

#### UL36 (CtoT) R to K

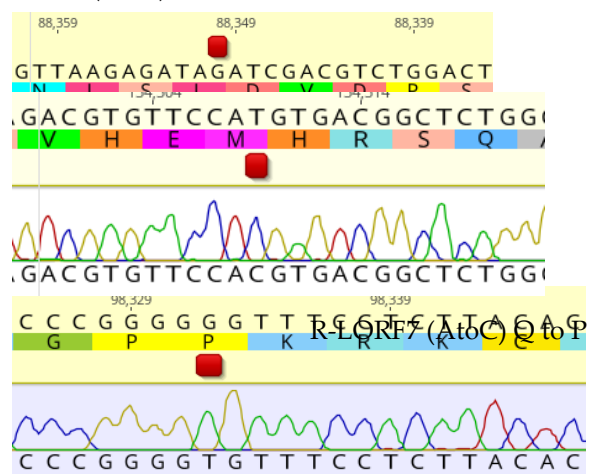

#### ICP4 (AtoG) S to P

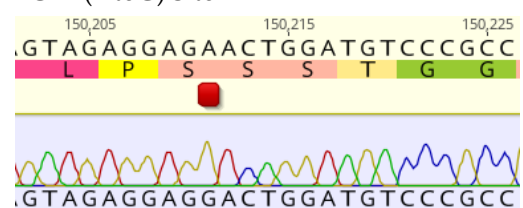

# R-LORF7 (CtoT) R to C

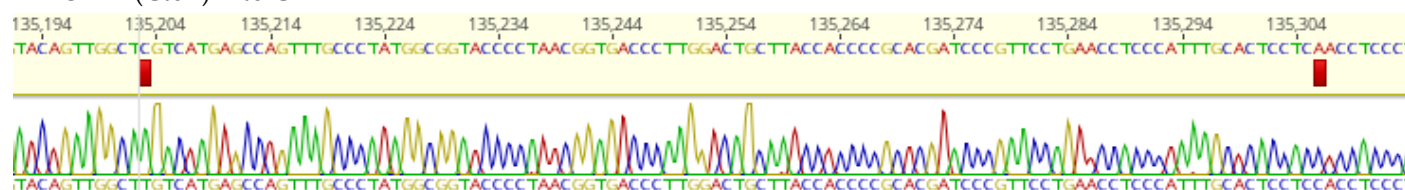

**Figure S4.** Sequence analysis of PCR amplicons from the SNPs modified 686-BAC virus. The alignment of sequencing data with parental 686-BAC was performed, and the specific changes in nucleotide sequences are indicated.

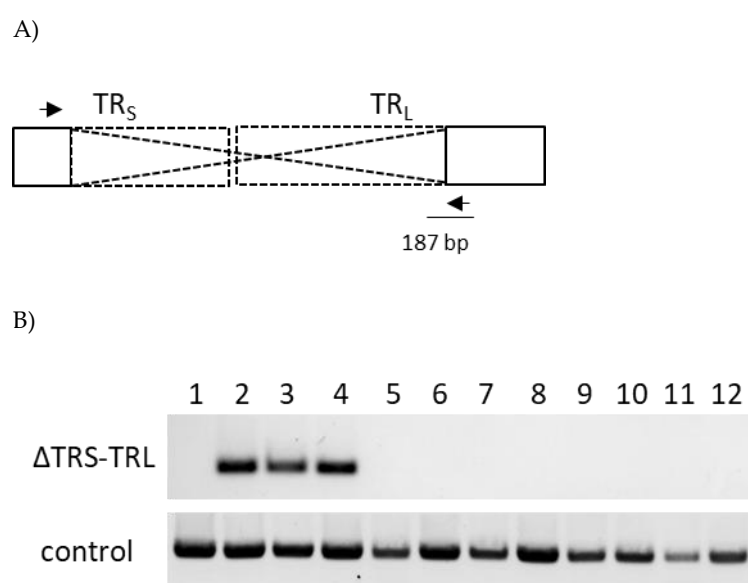

**Figure S5.** Restoration of TRS and TRL region of recombinant 686 viruses in virus infected cells and in vivo. A) The deleted region of MDV TRS and TRL are indicated, and primers used to amplify the junction of deleted regions are indicated. B) The junction of deletion was amplified from BAC plasmid DNA (lane 1-4), DNA extracted from virus infected CEFs at passage 7 (lane 5-8), and feather samples from virus infected chicken (lane 9-12). Lane 1,5,9: v686-BAC, Lane 2,6,10: v686ΔTRS-TRL, Lane 3,7,11: v686 mut1, Lane 4,8,12: v686 mut2. MDV UL22 region were amplified as a control with primers (Table S2).

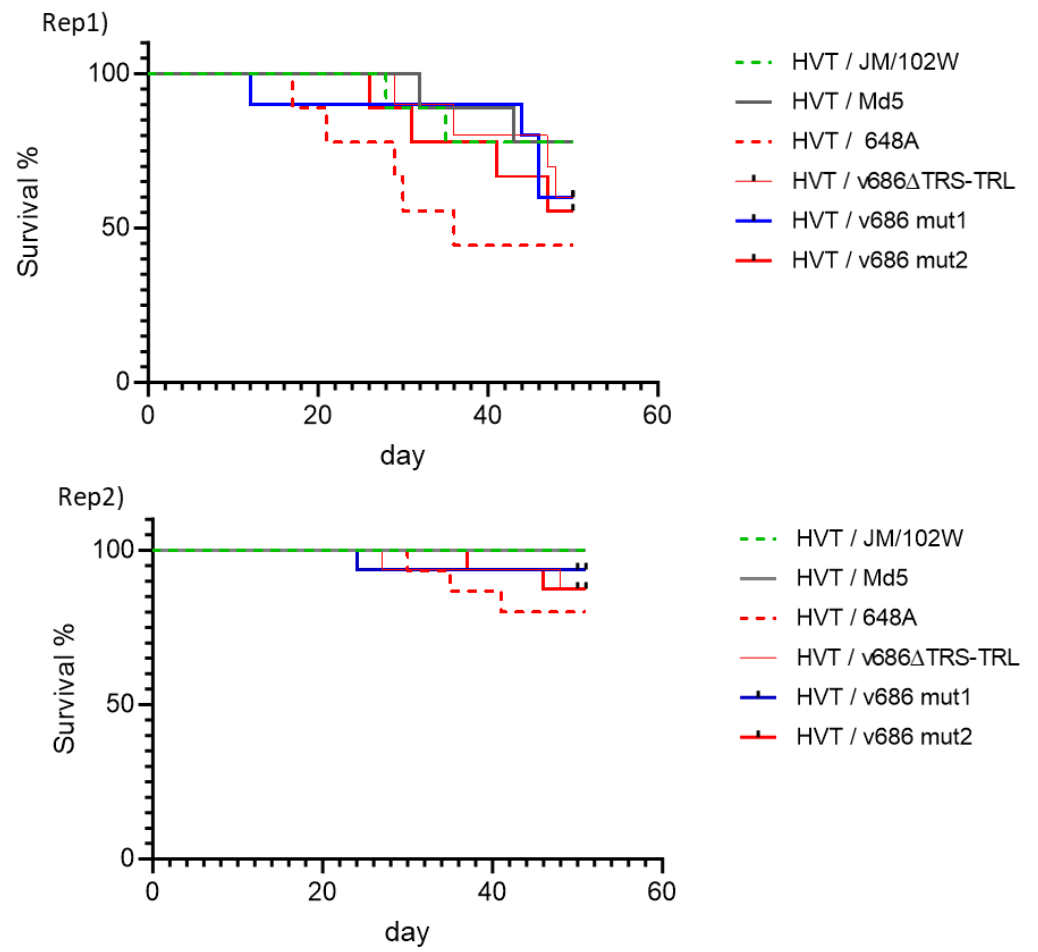

**Figure S6.** Survival curve of MDV JM/102W, Md5, 648A, v686 $\Delta$ TRS-TRL, v686 mut1, or v686 mut2 challenged group in HVT-vaccinated birds.

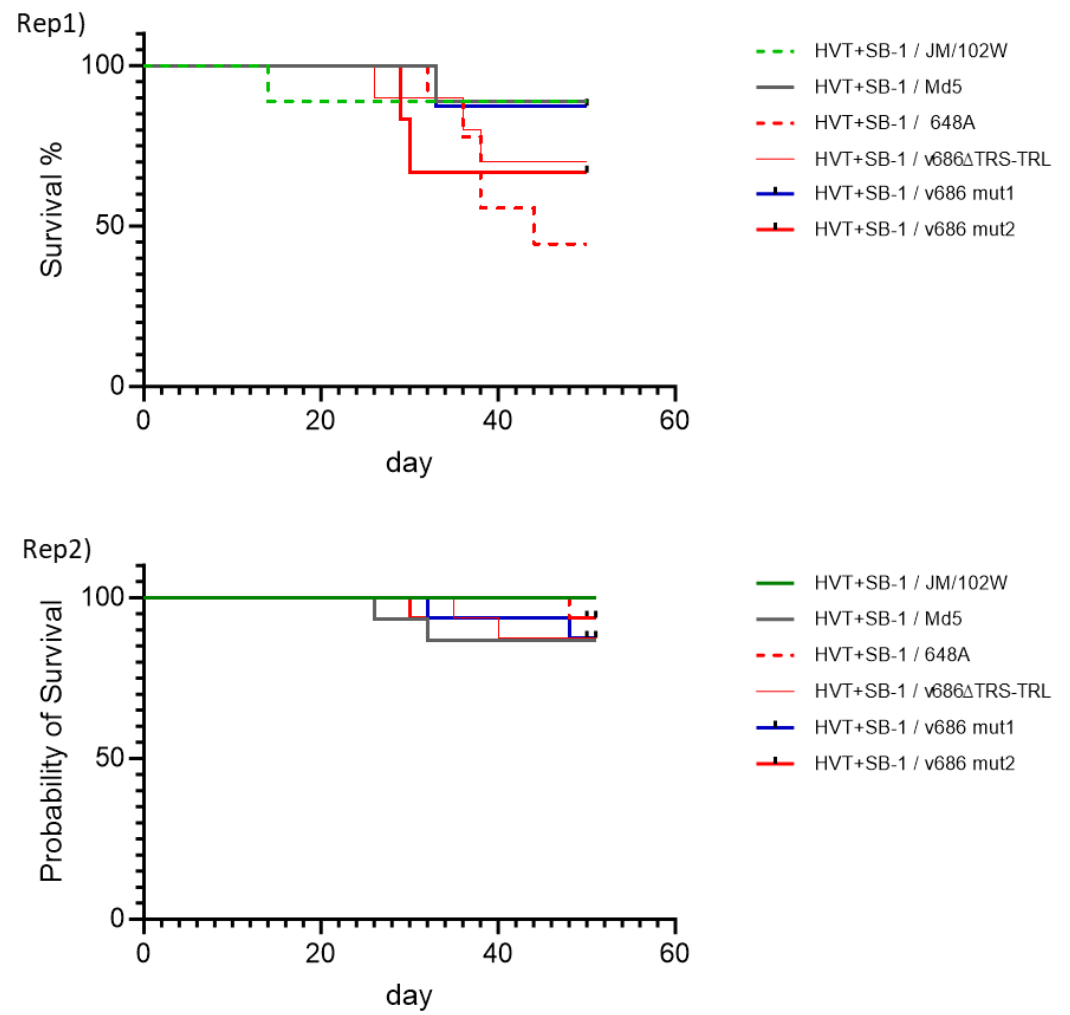

**Figure S7.** Survival curve of MDV JM/102W, Md5, 648A, v686ΔTRS-TRL, v686 mut1, or v686 mut2 challenged group in bivalent-vaccinated birds.

**Table S1.** The Oligonucleotides are used to delete the terminal repeat region in Marek's disease virus strain 686 genome.

| Primer    | Sequences (5' to 3')*                                                   |
|-----------|-------------------------------------------------------------------------|
| delTRS.FP | ATGGACAACCCGCCTGATTTTCGACAGCTTGTGGCAGCTTTTGACGAAGAgtaggctg-gagctgcttc   |
| delTRL.RP | ACGTGTGTATCGTGGTCGTCTACTGTTTGTGGTGGTATTGAAACATCTTCaattgg-gatccgtcgacctg |

\*The upper case indicates the homologous sequences for MDV 686-BAC for recombination. The low case indicates that the sequences were used to amplify the selection of kanamycin-resistant gene cassette from pRL128.

**Table S2.** Oligonucleotides to amplify the region of SNPs modification in the genome of Marek's disease virus strain 686.

| ORF     | Primer        | Sequence (5' to 3')      | Amplicon (bp) |
|---------|---------------|--------------------------|---------------|
| UL22    | 686UL22.FP    | CCGTACGATTGTACCATTGTTGGG | 944           |
|         | 686UL22.RP    | ATCTGGGGGAGCATGTTTCG     |               |
| UL36    | 686UL36.FP    | ACGCCAACCACAATTAAACAA    | 996           |
|         | 686UL36.RP    | GCTCCAGATGATGTAGATCTGACT |               |
| UL37    | 686UL37.FP    | CGGCCAGATCCCCTACATTAA    | 991           |
|         | 686UL37.RP    | CCGTTTCAGCGTGTGAGGATA    |               |
| UL41    | 686UL41.FP    | CGCCGATCTTGCTCTTCGTA     | 897           |
|         | 686UL41.RP    | AAAAACTGCGAGGGGTCATCA    |               |
| UL43    | 686UL43.FP    | GCAACGCATGAAGAAGCCAT     | 886           |
|         | 686UL43.RP    | CTGTGGAAGGTGCATGAGGT     |               |
| R-LORF8 | 686R-LORF8.FP | GATAATGCCCTCGCCGATCA     | 991           |
|         | 686R-LORF8.RP | TTTACACCTGTACCGTGCCC     |               |
| R-LORF7 | 686R-LORF7.FP | GATTCCTAGGCAGGCGTCTC     | 945           |
|         | 686R-LORF7.RP | ATGTGGGGGAGATGGGGTAA     |               |
| ICP4    | 686ICP4.FP    | GGAGATGGAATGGGAGCAGG     | 947           |
|         | 686ICP4.RP    | ATGGACAACCCGCCTGATTT     |               |

**Table S3.** Marek's disease lesion score and tumor formation of ADOL 15 x 7 SPF chickens infected with recombinant MDV with SNPs modification and parental virus.

Rep1

| Virus        | # of birds | Chick mortality | Birds at risk | Thymus atrophy (TA) |                       |         | Bursa atrophy (BA) |                       |         | Nerve enlargement |       |          |         |
|--------------|------------|-----------------|---------------|---------------------|-----------------------|---------|--------------------|-----------------------|---------|-------------------|-------|----------|---------|
|              |            |                 |               | # of birds          | Lesion scores         | Average | # of birds         | Lesion scores         | Average | # of birds        | vagus | brachial | sciatic |
| None         | 15         | 0               | 15            | 0                   | 0                     | 0.00    | 0                  | 0                     | 0.0     | 0                 | 0     | 0        | 0       |
| v686-BAC     | 15         | 0               | 15            | 10                  | 3,3,2,4,3,3,4,3,3,3,  | 3.10    | 10                 | 3,2,3,3,3,3,3,3,3,2   | 2.8     | 3                 | 3     | 2        | 2       |
| v686ΔTRS-TRL | 15         | 3               | 12            | 11                  | 4,4,4,3,4,4,4,3,3,1,4 | 3.45    | 10                 | 3,2,2,2,3,2,3,3,3,4   | 2.8     | 7                 | 7     | 6        | 6       |
| v686 mut1    | 15         | 7               | 8             | 7                   | 2,3,4,4,4,2,3         | 3.14    | 7                  | 2,3,4,3,4,2,3         | 3.0     | 2                 | 2     | 2        | 1       |
| v686 mut2    | 15         | 1               | 14            | 11                  | 3,2,1,2,2,3,3,3,3,4,2 | 2.55    | 11                 | 3,3,1,2,1,3,3,4,3,4,2 | 2.6     | 7                 | 7     | 3        | 4       |

| Virus        | Birds at risk | # of birds with tumor | # of tumor per bird | Organ with tumor |        |        |       |       |          |      |
|--------------|---------------|-----------------------|---------------------|------------------|--------|--------|-------|-------|----------|------|
|              |               |                       |                     | gonad            | spleen | kidney | heart | liver | pancreas | lung |
| None         | 15            | 0                     | 0                   | 0                | 0      | 0      | 0     | 0     | 0        | 0    |
| v686-BAC     | 15            | 2                     | 4,2                 | 2                | 2      | 1      | 1     | 0     | 0        | 0    |
| v686ΔTRS-TRL | 12            | 6                     | 1,2,1,1,2,3         | 5                | 2      | 0      | 2     | 1     | 0        | 0    |
| v686 mut1    | 8             | 3                     | 2,4,2,3             | 4                | 4      | 0      | 2     | 1     | 0        | 0    |
| v686 mut2    | 14            | 9                     | 4,3,2,7,1,1,1,4,3   | 3                | 7      | 2      | 7     | 4     | 1        | 2    |

Rep2

| Virus        | # of birds | Chick mortality | Birds at risk | Thymus atrophy (TA) |                     |         | Bursa atrophy (BA) |                      |         | Nerve enlargement |       |          |         |
|--------------|------------|-----------------|---------------|---------------------|---------------------|---------|--------------------|----------------------|---------|-------------------|-------|----------|---------|
|              |            |                 |               | # of birds          | Lesion scores       | Average | # of birds         | Lesion scores        | Average | # of birds        | vagus | brachial | sciatic |
| None         | 15         | 3               | 12            | 0                   | 0                   | 0.00    | 0                  | 0                    | 0.00    | 0                 | 0     | 0        | 0       |
| v686-BAC     | 15         | 6               | 9             | 9                   | 4,3,3,4,4,3,3,3,3,  | 3.33    | 9                  | 4,3,3,4,4,3,3,3,2    | 3.22    | 7                 | 6     | 7        | 6       |
| v686ΔTRS-TRL | 15         | 7               | 8             | 8                   | 3,4,4,3,4,4,2,3     | 3.38    | 8                  | 3,4,4,3,4,4,2,3      | 3.44    | 4                 | 4     | 4        | 3       |
| v686 mut1    | 15         | 1               | 14            | 10                  | 2,3,3,3,2,3,3,3,3,  | 2.80    | 10                 | 2,3,3,3,2,3,3,3,2,2, | 2.60    | 6                 | 6     | 4        | 2       |
| v686 mut2    | 15         | 0               | 15            | 10                  | 3,1,3,3,3,3,3,3,4,3 | 2.90    | 9                  | 3,3,3,3,3,3,2,4,2    | 2.91    | 7                 | 7     | 5        | 7       |

| Virus        | Birds at risk | # of birds with tumor | # of tumor per bird       | Organ with tumor |       |        |        |       |       |      |
|--------------|---------------|-----------------------|---------------------------|------------------|-------|--------|--------|-------|-------|------|
|              |               |                       |                           | proventricular   | gonad | spleen | kidney | heart | liver | lung |
| None         | 12            | 0                     | 0                         | 0                | 0     | 0      | 0      | 0     | 0     | 0    |
| v686-BAC     | 9             | 6                     | 1,2,3,2,5,1               | 0                | 3     | 4      | 0      | 5     | 2     | 0    |
| v686ΔTRS-TRL | 8             | 3                     | 4,2,2                     | 0                | 2     | 2      | 0      | 2     | 2     | 0    |
| v686 mut1    | 14            | 11                    | 2,2,2,1,5,3,2,<br>1,4,4,3 | 1                | 5     | 10     | 1      | 6     | 6     | 0    |
| v686 mut2    | 15            | 9                     | 4,3,2,7,1,1,1,<br>4,3     | 2                | 7     | 7      | 2      | 7     | 5     | 1    |



**Table S4.** Marek's disease lesion score and tumor formation of commercial SPF chickens infected with recombinant MDV with SNPs modification and parental virus..

Rep1

| Vaccine | Challenge    | # of birds | Chick mortality | Birds at risk | Thymus atrophy (TA) |                                         |         | Bursa atrophy (BA) |                                         |         | Nerve enlargement |       |           |         |
|---------|--------------|------------|-----------------|---------------|---------------------|-----------------------------------------|---------|--------------------|-----------------------------------------|---------|-------------------|-------|-----------|---------|
|         |              |            |                 |               | # of birds          | Lesion scores                           | Average | # of birds         | Lesion scores                           | Average | # of birds        | vagus | bra-chial | sciatic |
| None    | JM/102W      | 16         | 0               | 16            | 11                  | 2,2,3,2,2,2,<br>2,3,3,3,1               | 1.56    | 11                 | 2,2,3,2,2,2,2,<br>2,2,2,1               | 1.38    | 15                | 15    | 15        | 15      |
| HVT     |              | 9          | 0               | 9             | 2                   | 2,3                                     | 0.56    | 2                  | 1,2                                     | 0.33    | 2                 | 2     | 2         | 2       |
| HVT+SB1 |              | 9          | 0               | 9             | 1                   | 2                                       | 0.22    | 1                  | 1                                       | 0.11    | 1                 | 1     | 1         | 0       |
| None    | Md5          | 16         | 0               | 16            | 14                  | 3,2,3,3,3,3,<br>3,3,1,3,2,3,<br>2,3     | 2.31    | 15                 | 3,3,2,3,3,2,3,<br>2,3,1,2,1,3,2,<br>3   | 2.25    | 14                | 14    | 14        | 13      |
| HVT     |              | 9          | 0               | 9             | 3                   | 2,3,2                                   | 0.78    | 3                  | 2,2,1                                   | 0.56    | 3                 | 2     | 2         | 3       |
| HVT+SB1 |              | 9          | 0               | 9             | 1                   | 3                                       | 0.33    | 1                  | 3                                       | 0.33    | 2                 | 2     | 2         | 2       |
| None    | 648A         | 16         | 0               | 16            | 16                  | 3,3,3,3,2,3,<br>3,3,3,3,3,3,<br>2,3,3,2 | 2.81    | 16                 | 2,3,3,3,2,2,3,<br>3,3,3,2,3,3,2,<br>2,2 | 2.56    | 15                | 15    | 15        | 15      |
| HVT     |              | 9          | 0               | 9             | 7                   | 3,1,2,3,2,<br>3,2                       | 1.78    | 7                  | 2,1,2,3,3,3,2                           | 1.78    | 8                 | 6     | 8         | 7       |
| HVT+SB1 |              | 9          | 0               | 9             | 5                   | 2,2,3,3,3                               | 1.44    | 5                  | 1,1,3,2,2                               | 1.00    | 5                 | 5     | 5         | 5       |
| None    | v686ΔTRS-TRL | 16         | 1               | 15            | 15                  | 2,3,3,3,3,3,<br>3,2,2,3,3,2,<br>2,2,3   | 2.60    | 15                 | 2,2,2,3,2,2,2,<br>2,2,2,3,2,2,2,<br>3   | 2.20    | 15                | 15    | 15        | 15      |
| HVT     |              | 10         | 0               | 10            | 5                   | 3,3,1,3,1                               | 1.10    | 3                  | 3,3,2                                   | 0.80    | 6                 | 4     | 6         | 5       |
| HVT+SB1 |              | 10         | 0               | 10            | 6                   | 1,2,3,3,3,2                             | 1.40    | 7                  | 1,2,3,3,1,3,2                           | 1.50    | 7                 | 6     | 7         | 6       |
| None    | v686 mut1    | 16         | 0               | 16            | 16                  | 3,3,3,3,3,2,<br>2,2,3,3,3,2,<br>2,3,3   | 2.67    | 15                 | 2,2,3,3,2,3,3,<br>2,3,2,2,2,2,2,<br>3   | 2.40    | 15                | 12    | 15        | 15      |
| HVT     |              | 10         | 0               | 10            | 5                   | 2,2,2,2,2                               | 1.00    | 4                  | 1,2,2,2                                 | 0.70    | 5                 | 5     | 5         | 5       |
| HVT+SB1 |              | 10         | 2               | 8             | 2                   | 3,3                                     | 0.75    | 2                  | 3,3                                     | 0.75    | 2                 | 2     | 2         | 1       |
| None    | v686 mut2    | 16         | 0               | 16            | 16                  | 3,2,1,3,3,3,<br>3,3,3,3,3,3,<br>3,3,2,2 | 2.69    | 16                 | 3,2,2,3,2,3,2,<br>3,3,2,3,2,2,2,<br>1   | 2.38    | 16                | 14    | 16        | 16      |
| HVT     |              | 10         | 1               | 9             | 4                   | 3,2,2,1                                 | 0.89    | 4                  | 3,2,2,1                                 | 0.89    | 4                 | 4     | 4         | 4       |
| HVT+SB1 |              | 10         | 4               | 6             | 2                   | 3,2                                     | 0.83    | 3                  | 2,2,2                                   | 1.00    | 3                 | 3     | 3         | 3       |

[illegible]

## Rep 2

| Vaccine | Challenge    | # of birds | Chick mortality | Birds at risk | Thymus atrophy (TA) |                              |         | Bursa atrophy (BA) |                               |         | Nerve enlargement |       |           |         |
|---------|--------------|------------|-----------------|---------------|---------------------|------------------------------|---------|--------------------|-------------------------------|---------|-------------------|-------|-----------|---------|
|         |              |            |                 |               | # of birds          | Lesion scores                | Average | # of birds         | Lesion scores                 | Average | # of birds        | vagus | bra-chial | sciatic |
| None    | JM/102W      | 13         | 0               | 13            | 5                   | 1,1,3,3,1                    | 0.69    | 4                  | 1,2,3,2                       | 0.62    | 6                 | 6     | 6         | 6       |
| HVT     |              | 16         | 0               | 16            | 0                   |                              | 0.00    | 0                  |                               | 0.00    | 0                 |       |           |         |
| HVT+SB1 |              | 16         | 0               | 16            | 0                   |                              | 0.00    | 0                  |                               | 0.00    | 0                 |       |           |         |
| None    | Md5          |            |                 |               |                     | 3,3,3,2,3,3,<br>3,3,2,2,3,3, |         |                    | 3,3,3,1,2,3,3,<br>3,2,2,3,2,2 |         | 13                | 13    | 13        | 13      |
|         |              | 13         | 0               | 13            | 13                  | 2                            | 2.69    | 13                 |                               |         |                   |       |           |         |
| HVT     |              | 16         | 1               | 15            | 0                   |                              | 0.00    | 0                  |                               | 0.00    | 1                 | 0     | 1         | 1       |
| HVT+SB1 |              | 16         | 1               | 15            | 2                   | 3,2                          | 0.33    | 2                  | 2,1                           | 0.20    | 3                 | 2     | 3         | 3       |
| None    | 648A         |            |                 |               |                     | 3,3,3,3,3,2,<br>3,3,2,3,3,2, |         |                    | 3,3,3,2,3,3,4,<br>3,3,4,3     |         | 11                | 11    | 11        | 11      |
|         |              | 13         | 2               | 11            | 13                  | 2                            | 3.18    | 11                 |                               |         |                   |       |           |         |
| HVT     |              | 16         | 1               | 15            | 8                   | 2,1,3,3,1,1,<br>1,2          | 0.93    | 8                  | 1,2,2,2,2,1,2,<br>1           | 0.87    | 10                | 10    | 10        | 10      |
| HVT+SB1 |              | 16         | 0               | 16            | 2                   | 3,3                          | 0.31    | 3                  | 1,2,2                         | 0.31    | 4                 | 4     | 4         | 4       |
| None    | v686ΔTRS-TRL |            |                 |               |                     | 3,3,3,3,3,2,<br>3,3,2,3,3,2, |         |                    | 3,2,2,3,3,2,2,<br>3,2,3,2,2,2 |         | 13                | 13    | 13        | 13      |
|         |              | 13         | 0               | 13            | 12                  | 2                            | 2.69    | 13                 |                               |         |                   |       |           |         |
| HVT     |              | 16         | 0               | 16            | 2                   | 3,3                          | 0.38    | 2                  | 2,2                           | 0.25    | 2                 | 2     | 2         | 2       |
| HVT+SB1 |              | 16         | 0               | 16            | 2                   | 3,3                          | 0.38    | 2                  | 3,2                           | 0.31    | 2                 | 2     | 2         | 2       |
| None    | v686 mut1    |            |                 |               |                     | 3,3,3,3,3,3,<br>3,3,2        |         |                    | 2,3,2,2,3,3,2,<br>2,2         |         | 9                 | 9     | 9         | 9       |
|         |              | 13         | 0               | 13            | 9                   |                              | 2.00    | 9                  |                               |         |                   |       |           |         |
| HVT     |              | 16         | 0               | 16            | 3                   | 2,2,2                        | 0.38    | 3                  | 2,2,2                         | 0.38    | 3                 | 3     | 3         | 2       |
| HVT+SB1 |              | 16         | 0               | 16            | 2                   | 3,1                          | 0.25    | 1                  | 3                             | 0.19    | 2                 | 1     | 2         | 2       |
| None    | v686 mut2    |            |                 |               |                     | 3,2,3,3,2,2,<br>2,2,3,2,3    |         |                    | 3,2,2,2,2,2,2,<br>2,3,2,3     |         | 12                | 11    | 12        | 11      |
|         |              | 13         | 1               | 12            | 12                  |                              | 2.25    | 11                 |                               |         |                   |       |           |         |
| HVT     |              | 16         | 0               | 16            | 2                   | 2,3                          | 0.31    | 2                  | 2,2                           | 0.25    | 3                 | 3     | 3         | 3       |
| HVT+SB1 |              | 16         | 0               | 16            | 1                   | 3                            | 0.19    | 1                  | 2                             | 0.13    | 2                 | 1     | 2         | 2       |

| Vaccine | Challenge        | # of birds | # of bird with tumor | # of tumor per bird | Organs with tumor |       |        |        |       |       |          |           |        |
|---------|------------------|------------|----------------------|---------------------|-------------------|-------|--------|--------|-------|-------|----------|-----------|--------|
|         |                  |            |                      |                     | proven-tricular   | gonad | spleen | kidney | heart | liver | pancreas | intestine | thymus |
| None    | JM/102W          | 13         | 1                    | 1                   | 0                 | 0     | 1      | 0      | 0     | 0     | 0        | 0         | 0      |
| HVT     |                  | 16         | 0                    | 0                   | 0                 | 0     | 0      | 0      | 0     | 0     | 0        | 0         | 0      |
| HVT+SB1 |                  | 16         | 0                    | 0                   | 0                 | 0     | 0      | 0      | 0     | 0     | 0        | 0         | 0      |
| None    | Md5              | 13         | 7                    | 3,3,3,1,3,1,1       | 0                 | 0     | 3      | 1      | 7     | 4     | 0        | 0         | 0      |
| HVT     |                  | 15         | 0                    | 0                   | 0                 | 0     | 0      | 0      | 0     | 0     | 0        | 0         | 0      |
| HVT+SB1 |                  | 15         | 1                    | 1                   | 0                 | 0     | 1      | 0      | 0     | 0     | 0        | 0         | 0      |
| None    | 648A             | 11         | 6                    | 2,2,1,1,1,1         | 1                 | 0     | 2      | 0      | 5     | 0     | 0        | 0         | 0      |
| HVT     |                  | 15         | 4                    | 1,1,2,1             | 0                 | 0     | 4      | 0      | 1     | 0     | 0        | 0         | 0      |
| HVT+SB1 |                  | 16         | 2                    | 3,1                 | 0                 | 0     | 2      | 0      | 1     | 1     | 0        | 0         | 0      |
| None    | v686ΔTRS<br>-TRL | 13         | 8                    | 2,3,1,3,1,1,3,2     | 0                 | 1     | 5      | 2      | 7     | 1     | 0        | 0         | 0      |
| HVT     |                  | 16         | 2                    | 2,2                 | 0                 | 1     | 1      | 0      | 2     | 0     | 0        | 0         | 0      |
| HVT+SB1 |                  | 16         | 1                    | 1                   | 0                 | 0     | 0      | 0      | 1     | 0     | 0        | 0         | 0      |
| None    | v686 mut1        | 13         | 7                    | 2,2,3,1,1,3,2       | 0                 | 1     | 4      | 0      | 5     | 4     | 0        | 0         | 0      |
| HVT     |                  | 16         | 2                    | 1,3                 | 0                 | 1     | 1      | 0      | 1     | 0     | 0        | 1         | 0      |
| HVT+SB1 |                  | 16         | 2                    | 1,1                 | 0                 | 1     | 0      | 0      | 1     | 0     | 0        | 0         | 0      |
| None    | v686 mut2        | 12         | 9                    | 4,1,3,1,1,1,1,3,5   | 0                 | 2     | 5      | 3      | 5     | 4     | 0        | 0         | 1      |
| HVT     |                  | 16         | 1                    | 5                   | 1                 | 1     | 1      | 0      | 1     | 1     | 0        | 0         | 0      |
| HVT+SB1 |                  | 16         | 2                    | 2,3                 | 0                 | 0     | 1      | 2      | 1     | 1     | 0        | 0         | 0      |

**Table S5.** Statistical differences of survival in pathotype assay

| Rep1                   | none | HVT | HVT+SB-1 | none | HVT | HVT+SB-1 | none         | HVT | HVT+SB-1 | none      | HVT | HVT+SB-1 | none      | HVT | HVT+SB-1 |
|------------------------|------|-----|----------|------|-----|----------|--------------|-----|----------|-----------|-----|----------|-----------|-----|----------|
|                        | Md5  |     |          | 648A |     |          | v686ΔTRS-TRL |     |          | v686 mut1 |     |          | v686 mut2 |     |          |
| None / JM/102W         | ns   |     |          | **   |     |          | **           |     |          | **        |     |          | **        |     |          |
| HVT / JM/102W          | ns   |     |          | ns   |     |          | ns           |     |          | ns        |     |          | ns        |     |          |
| HVT+ SB-1 / JM/102W    | ns   |     |          | ns   |     |          | ns           |     |          | ns        |     |          | ns        |     |          |
| None / Md5             |      |     |          | *    |     |          | **           |     |          | *         |     |          | ns        |     |          |
| HVT / Md5              |      |     |          | ns   |     |          | ns           |     |          | ns        |     |          | ns        |     |          |
| HVT+ SB-1 / Md5        |      |     |          | ns   |     |          | ns           |     |          | ns        |     |          | ns        |     |          |
| None / 648A            |      |     |          |      |     |          | ns           |     |          | ns        |     |          | ns        |     |          |
| HVT / 648A             |      |     |          |      |     |          | ns           |     |          | ns        |     |          | ns        |     |          |
| HVT+ SB-1 / 648A       |      |     |          |      |     |          | ns           |     |          | ns        |     |          | ns        |     |          |
| None / v686ΔTRS-TRL    |      |     |          |      |     |          |              |     |          | **        |     |          | **        |     |          |
| HVT / v686ΔTRS-TRL     |      |     |          |      |     |          |              |     |          | ns        |     |          | ns        |     |          |
| HVT+ SB-1/v686ΔTRS-TRL |      |     |          |      |     |          |              |     |          | ns        |     |          | ns        |     |          |
| None / v686 mut1       |      |     |          |      |     |          |              |     |          |           |     |          | ns        |     |          |
| HVT / v686 mut1        |      |     |          |      |     |          |              |     |          |           |     |          | ns        |     |          |
| HVT+ SB-1/ v686 mut1   |      |     |          |      |     |          |              |     |          |           |     |          | ns        |     |          |

| Rep2                   | none | HVT | HVT+SB-1 | none | HVT | HVT+SB-1 | none         | HVT | HVT+SB-1 | none      | HVT | HVT+SB-1 | none      | HVT | HVT+SB-1 |
|------------------------|------|-----|----------|------|-----|----------|--------------|-----|----------|-----------|-----|----------|-----------|-----|----------|
|                        | Md5  |     |          | 648A |     |          | v686ΔTRS-TRL |     |          | v686 mut1 |     |          | v686 mut2 |     |          |
| None / JM/102W         | **   |     |          | **   |     |          | **           |     |          | *         |     |          | **        |     |          |
| HVT / JM/102W          | ns   |     |          | ns   |     |          | ns           |     |          | ns        |     |          | ns        |     |          |
| HVT+ SB-1 / JM/102W    | ns   |     |          | ns   |     |          | ns           |     |          | ns        |     |          | ns        |     |          |
| None / Md5             |      |     |          | ns   |     |          | ns           |     |          | ns        |     |          | ns        |     |          |
| HVT / Md5              |      |     |          | ns   |     |          | ns           |     |          | ns        |     |          | ns        |     |          |
| HVT+ SB-1 / Md5        |      |     |          | ns   |     |          | ns           |     |          | ns        |     |          | ns        |     |          |
| None / 648A            |      |     |          |      |     |          | *            |     |          | *         |     |          | *         |     |          |
| HVT / 648A             |      |     |          |      |     |          | ns           |     |          | ns        |     |          | ns        |     |          |
| HVT+ SB-1 / 648A       |      |     |          |      |     |          | ns           |     |          | ns        |     |          | ns        |     |          |
| None / v686ΔTRS-TRL    |      |     |          |      |     |          |              |     |          | ns        |     |          | ns        |     |          |
| HVT / v686ΔTRS-TRL     |      |     |          |      |     |          |              |     |          | ns        |     |          | ns        |     |          |
| HVT+ SB-1/v686ΔTRS-TRL |      |     |          |      |     |          |              |     |          | ns        |     |          | ns        |     |          |
| None / v686 mut1       |      |     |          |      |     |          |              |     |          |           |     |          | ns        |     |          |
| HVT / v686 mut1        |      |     |          |      |     |          |              |     |          |           |     |          | ns        |     |          |
| HVT+ SB-1/v686 mut1    |      |     |          |      |     |          |              |     |          |           |     |          | ns        |     |          |

Statistical differences ( $p$ -value < 0.05) between groups are indicated (ns = not significant, \* $p$ -value < 0.05, \*\*  $p$ -value < 0.01).
